# Supplementary material for: Psychophysical predictors of experimental muscle pain intensity following fatiguing calf exercise
Source: PubMed Central journal article supplement (PMC8323909; doi:10.1371/journal.pone.0253945), 2021-07-30
Supplement: pone.0253945.s001.pdf [file pone.0253945.s001.pdf]

**S1 Data: Individual Data for all main outcomes on Day-0, pain reports on Day-2 and change in psychophysical outcomes to Day-2.**

| Baseline (Day-0) Individual Data for all Main Outcomes |     |      |     |     |      |       |      |       |      |     |      |      | DOMS (Day-2) |        | Change in Psychophysical Outcomes (Day-2) |       |       |       |      |       |      |      |      |
|--------------------------------------------------------|-----|------|-----|-----|------|-------|------|-------|------|-----|------|------|--------------|--------|-------------------------------------------|-------|-------|-------|------|-------|------|------|------|
| ID                                                     | PCS | IPAQ | Neg | Pos | PSQI | Force | cPDT | cPTT  | TSP  | CPM | PPTi | PPTc | PPTu         | Likert | VAS                                       | Force | cPDT  | cPTT  | TSP  | CPM   | PPTi | PPTc | PPTu |
| 1                                                      | 17  | 960  | 11  | 34  | 10   | 482   | 17.4 | 49.4  | 2.0  | 19  | 534  | 577  | 536          | 5      | 7.0                                       | -172  | 5.7   | -2.6  | 0.8  | -8.7  | -20  | -139 | -173 |
| 2                                                      | 0   | 4239 | 12  | 31  | 6    | 560   | 24.7 | 54.4  | 3.4  | 11  | 295  | 286  | 300          | 2      | 3.0                                       | 435   | 0.4   | 3.4   | 0.6  | -8.9  | -96  | 94   | -56  |
| 3                                                      | 15  | 1836 | 15  | 33  | 6    | 383   | 19.9 | 49.4  | .8   | 11  | 380  | 284  | 340          | 1      | 2.0                                       | -47   | 4.2   | -3.6  | 0.1  | -4.3  | 41   | 77   | 886  |
| 4                                                      | 19  | 777  | 11  | 21  | 4    | 824   | 16.7 | 79.1  | 3.1  | -3  | 323  | 364  | 223          | 4      | 2.8                                       | 285   | 7.3   | 17.7  | 0.4  | -8.6  | -38  | -49  | -13  |
| 5                                                      | 5   | 2598 | 13  | 35  | 3    | 1034  | 50.7 | 100.6 | 1.6  | 12  | 574  | 463  | 855          | 1      | 1.1                                       | -264  | -6.7  | -0.5  | 1.0  | -2.9  | -127 | -91  | -528 |
| 6                                                      | 10  | 933  | 12  | 25  | 4    | 742   | 33.0 | 62.7  | 2.6  | 1   | 448  | 445  | 266          | 5      | 4.0                                       | 172   | -0.8  | -8.2  | 0.2  | -2.3  | -203 | -151 | 208  |
| 7                                                      | 13  | 2076 | 11  | 31  | 5    | 1125  | 27.5 | 67.3  | -1.0 | -4  | 319  | 476  | 318          | 5      | 4.7                                       | -746  | -1.9  | 1.5   | 3.6  | 21.3  | 70   | -12  | -20  |
| 8                                                      | 9   | 499  | 10  | 23  | 3    | 576   | 40.2 | 100.7 | .1   | 45  | 691  | 711  | 733          | 4      | 1.1                                       | -219  | 12.1  | 0.1   | 0.4  | -19.4 | -233 | -141 | 9    |
| 9                                                      | 18  | 80   | 11  | 32  | 4    | 1026  | 42.1 | 80.7  | 2.2  | 5   | 308  | 390  | 306          | 4      | 0.7                                       | -314  | -11.4 | -22.0 | 0.0  | 0.4   | -73  | 9    | -90  |
| 10                                                     | 20  | 2730 | 10  | 39  | 5    | 1392  | 21.8 | 73.2  | -4   | 26  | 783  | 761  | 595          | 4      | 2.2                                       | -900  | 14.3  | -0.1  | 0.6  | -8.7  | -189 | -21  | -200 |
| 11                                                     | 18  | 4530 | 12  | 33  | 2    | 694   | 33.3 | 47.6  | 3.7  | 15  | 283  | 235  | 174          | 6      | 5.9                                       | -120  | -14.9 | -4.2  | 0.4  | -0.2  | -50  | 43   | -9   |
| 12                                                     | 10  | 1485 | 13  | 27  | 4    | 1429  | 28.7 | 81.0  | 4.3  | 27  | 491  | 416  | 322          | 5      | 6.2                                       | -664  | 0.8   | 2.5   | -2.6 | 8.9   | -62  | 1    | -29  |
| 13                                                     | 24  | 1699 | 12  | 30  | 4    | 858   | 14.5 | 67.9  | 2.5  | 11  | 257  | 317  | 322          | 4      | 2.8                                       | -344  | 0.2   | 6.5   | 2.0  | -12.8 | -41  | -6   | 21   |
| 14                                                     | 26  | 4164 | 11  | 35  | 4    | 202   | 37.7 | 74.1  | 3.1  | 1   | 378  | 323  | 274          | 6      | 8.8                                       | 127   | -13.3 | -12.4 | 0.5  | 1.1   | -93  | -41  | -55  |
| 15                                                     | 19  | 3375 | 10  | 33  | 3    | 332   | 18.1 | 70.5  | .3   | 6   | 192  | 166  | 218          | 5      | 5.9                                       | -19   | 2.7   | -4.3  | 0.0  | -7.2  | -85  | -16  | -64  |
| 16                                                     | 1   | 4640 | 11  | 22  | 8    | 828   | 37.3 | 41.0  | -2   | 0   | 534  | 474  | 376          | 4      | 1.8                                       | -80   | 12.2  | 24.8  | -0.2 | 17.6  | -69  | 99   | 9    |
| 17                                                     | 15  | 2937 | 12  | 29  | 3    | 442   | 20.2 | 90.8  | 2.2  | 19  | 240  | 230  | 149          | 3      | 4.4                                       | -4    | 20.1  | 4.4   | -0.1 | -32.8 | 156  | 64   | 7    |
| 18                                                     | 12  | 1017 | 19  | 36  | 8    | 694   | 47.1 | 98.8  | -3   | 30  | 414  | 428  | 192          | 4      | 1.0                                       | -262  | -6.9  | -2.2  | 0.3  | -27.6 | -98  | -53  | 18   |
| 19                                                     | 25  | 4518 | 12  | 35  | 2    | 1341  | 24.6 | 101.6 | .0   | -2  | 149  | 111  | 100          | 2      | 3.4                                       | -536  | 3.7   | 0.0   | 0.5  | 4.5   | -33  | -8   | -14  |
| 20                                                     | 24  | 5358 | 12  | 28  | 4    | 679   | 36.4 | 67.7  | 1.9  | 10  | 386  | 304  | 243          | 5      | 4.1                                       | -286  | -3.9  | 12.5  | 0.1  | 2.6   | -150 | -124 | -112 |
| 21                                                     | 11  | 600  | 11  | 31  | 4    | 329   | 17.5 | 71.5  | 2.4  | 2   | 680  | 483  | 590          | 1      | 1.0                                       | 46    | -4.0  | -11.1 | -1.7 | -6.4  | -78  | -66  | -57  |
| 22                                                     | 5   | 3970 | 13  | 34  | 4    | 335   | 24.7 | 68.8  | -1.0 | -1  | 273  | 303  | 220          | 3      | 1.7                                       | 167   | 4.4   | 0.6   | 1.8  | -5.2  | 90   | 55   | 62   |
| 23                                                     | 10  | 2946 | 12  | 22  | 3    | 1226  | 43.0 | 101.6 | 1.6  | 9   | 235  | 271  | 226          | 3      | 0.0                                       | -317  | -7.7  | 0.0   | -0.2 | -2.2  | 62   | 60   | -12  |
| 24                                                     | 19  | 1455 | 10  | 21  | 4    | 1068  | 32.0 | 71.7  | -1.0 | 16  | 383  | 477  | 404          | 1      | 0.6                                       | -37   | -4.1  | -20.7 | 2.2  | -10.6 | -119 | -79  | -128 |
| 25                                                     | 16  | 1146 | 14  | 31  | 8    | 516   | 28.9 | 70.9  | 2.4  | 17  | 680  | 781  | 416          | 3      | 1.0                                       | 348   | 10.2  | 29.3  | -1.3 | 6.5   | 12   | -176 | -95  |
| 26                                                     | 8   | 4076 | 12  | 39  | 3    | 1308  | 31.7 | 101.5 | -7   | -10 | 732  | 528  | 816          | 0      | 1.0                                       | -131  | 3.8   | 0.1   | 1.4  | -12.2 | 54   | 142  | 82   |
| 27                                                     | 19  | 2826 | 12  | 23  | 7    | 1131  | 21.3 | 60.4  | 1.0  | 7   | 214  | 159  | 165          | 3      | 1.6                                       | 207   | 3.1   | 6.6   | 0.5  | -3.6  | 22   | 21   | -28  |
| 28                                                     | 20  | 1200 | 11  | 31  | 2    | 520   | 20.3 | 41.5  | -2   | -10 | 102  | 97   | 101          | 3      | 4.7                                       | -129  | -0.5  | 4.1   | 1.7  | 4.6   | 11   | 30   | 5    |

Note: ID, arbitrary number of subject; PCS, Pain Catastrophizing Scale; IPAQ, International Physical Activity Questionnaire (MET-min/week); Neg/Pos, Positive and Negative Affective Schedule – Negative/Positive subscales; PSQI, Pittsburgh Sleep Quality Index; Force, isometric force production (kPa); cPDT, cuff pain detection threshold (kPa); cPTT (cuff pain tolerance threshold); TSP, temporal summation of pain (cm); CPM, conditioned pain modulation (kPa); PPTi/c/u, pressure pain threshold (kPa) at index/contralateral leg/upper trapezius; Likert, scale of lower limb muscle soreness (0-6); VAS, visual analogue scale (0-10cm).
